# Supplementary material
Source: Springer Nature journal article supplement (https://www.springermedizin.de/resource/supplementary/12916_2009_214_MOESM4_ESM.pdf/9599408)

**Id, Sex, Study name**

**Relative Risk  
95% CI**

**Relative Risk  
95% CI**

**USA**

**1 M Lutheran Brotherhood**

**6 M CPS-II**

**14 M Williams and Horm 1977**

**Subtotal (95% CI)**

**SCANDINAVIA**

**9 M Norway Cohorts**

**10 M Swedish construction workers**

**17 M+F Hansson et al 1994**

**19 M Ye et al 1999**

**21 M+F Lagergren et al 2000**

**Subtotal (95% CI)**

**Total (95% CI)**

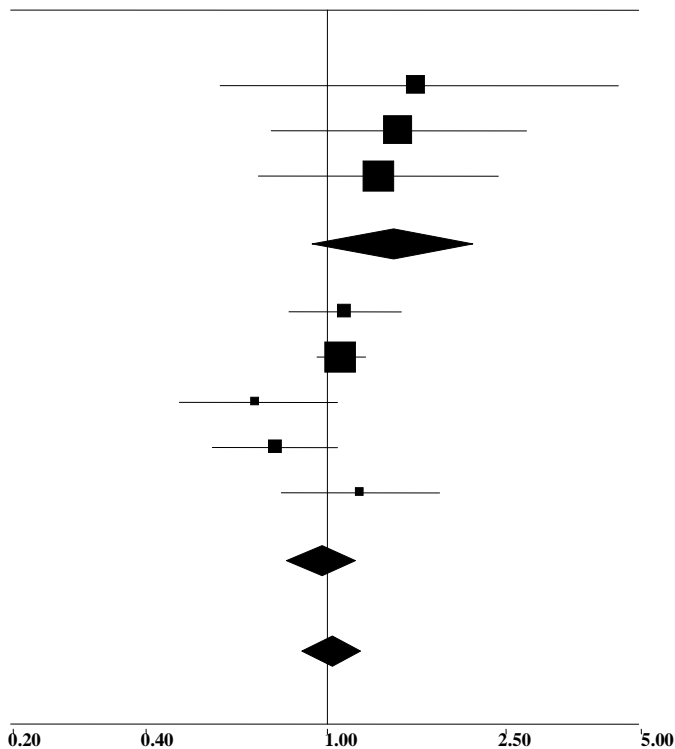

Supplement: MOESM4 [file 9599408]
